# Supplementary material for: Expanding the Versatility of Phage Display II: Improved Affinity Selection of Folded Domains on Protein VII and IX of the Filamentous Phage
Source: PLoS One. 2011 Feb 24;6(2):e17433. doi: 10.1371/journal.pone.0017433 (PMC3044770; doi:10.1371/journal.pone.0017433)
Supplement: Table S1 — A268nm vs. infection titer input in the “monoclonal” mock selection. (DOC) [file pone.0017433.s004.doc]

**Table S1.** A268nm vs. infection titer input in the “monoclonal” mock selection

| **Experiment** |  | **Display type** | **Input: 1010 virions** | **Input: 105 virions** |
| --- | --- | --- | --- | --- |
| **1** | **Input: cfuampR/cfukanR** | pVII | 5.4x 109/3.5x 107 | 5.4x 104/3.5x 102 |
| **1** | **Input: cfukanR/cfukanR** | pVIIpelB | 1.8x 107/1.5x 1010 | 1.8x 102/1.5x 105 |
| **2** | **Input: cfuampR/cfukanR** | pVII | 4.0x 109/4.7x 107 | 4.0x 104/4.7x 102 |
| **2** | **Input: cfukanR/cfukanR** | pVIIpelB | 5.2x 106/1.0x 1011 | 52/1.0x 106 |
